# Supplementary material
Source: PubMed Central journal article supplement (PMC3237232)
Supplement: supp_jn.111.147264_nut_147264_ST1.pdf [file supp_jn.111.147264_nut_147264_ST1.pdf]

Online Supporting Material

Supplemental Table 1. Numbers of women without breast cancer and women with breast cancer by tumor characteristic and tertile of lignan intakes in the Roswell Park Cancer Institute Databank and Biorepository<sup>1</sup>

| Lignan intake, $\mu\text{g}/\text{d}$ | Controls | Case Status | Tumor status   |          | Stage             |          |         | Grade   |         |         |
|---------------------------------------|----------|-------------|----------------|----------|-------------------|----------|---------|---------|---------|---------|
|                                       |          |             | <i>In situ</i> | Invasive | I<br><i>n</i> (%) | II       | III/IV  | 1       | 2       | 3       |
| Premenopausal women (n=416)           |          |             |                |          |                   |          |         |         |         |         |
| Total lignans                         |          |             |                |          |                   |          |         |         |         |         |
| <119                                  | 74 (37)  | 103 (48)    | 16 (40)        | 87 (50)  | 16 (40)           | 45 (52)  | 42 (48) | 6 (50)  | 16 (40) | 60 (42) |
| 119-187                               | 64 (32)  | 67 (31)     | 15 (38)        | 52 (30)  | 15 (38)           | 22 (25)  | 30 (34) | 3 (25)  | 16 (40) | 33 (29) |
| >187                                  | 64 (32)  | 44 (21)     | 9 (23)         | 35 (20)  | 9 (23)            | 20 (23)  | 15 (17) | 3 (25)  | 8 (20)  | 22 (19) |
| Lariciresinol                         |          |             |                |          |                   |          |         |         |         |         |
| <38.6                                 | 68 (34)  | 107 (50)    | 18 (45)        | 89 (51)  | 18 (45)           | 46 (53)  | 43 (49) | 6 (50)  | 20 (50) | 58 (50) |
| 38.6-61.5                             | 69 (34)  | 59 (28)     | 10 (25)        | 49 (28)  | 10 (25)           | 21 (24)  | 28 (32) | 2 (17)  | 13 (33) | 34 (30) |
| >61.5                                 | 65 (32)  | 48 (22)     | 12 (30)        | 36 (21)  | 12 (30)           | 20 (23)  | 16 (18) | 4 (33)  | 7(18)   | 23 (20) |
| Secoisolariciresinol                  |          |             |                |          |                   |          |         |         |         |         |
| <47.5                                 | 77 (38)  | 98 (46)     | 14 (35)        | 84 (48)  | 14 (35)           | 42 (48)  | 42 (48) | 6 (50)  | 15 (38) | 58 (50) |
| 47.5-74.8                             | 64 (32)  | 65 (30)     | 14 (35)        | 51 (29)  | 14 (35)           | 25 (29)  | 26 (30) | 3 (25)  | 14 (35) | 34 (30) |
| >74.8                                 | 61 (30)  | 51 (24)     | 12 (30)        | 39 (22)  | 12 (30)           | 20 (23)  | 19 (22) | 3 (25)  | 11 (28) | 23 (20) |
| Matairesinol                          |          |             |                |          |                   |          |         |         |         |         |
| <2.6                                  | 70 (35)  | 87 (41)     | 12 (30)        | 75 (43)  | 12 (30)           | 38 (44)  | 37 (43) | 7 (58)  | 15 (38) | 52 (45) |
| 2.6-4.4                               | 61 (30)  | 72 (34)     | 18 (45)        | 54 (31)  | 18 (45)           | 27 (31)  | 27 (31) | 4 (33)  | 11 (28) | 36 (31) |
| >4.4                                  | 71 (35)  | 55 (26)     | 10 (25)        | 45 (26)  | 10 (25)           | 22 (25)  | 23 (26) | 1 (8)   | 14 (35) | 27 (23) |
| Pinoresinol                           |          |             |                |          |                   |          |         |         |         |         |
| <18.9                                 | 75 (37)  | 108 (50)    | 19 (48)        | 89 (51)  | 19 (48)           | 47 (54)  | 42 (48) | 6 (50)  | 19 (48) | 59 (51) |
| 18.9-37.4                             | 60 (30)  | 61 (29)     | 13 (33)        | 48 (28)  | 13 (33)           | 19 (22)  | 29 (33) | 3 (25)  | 12 (30) | 31 (27) |
| >37.4                                 | 67 (33)  | 45 (21)     | 8 (20)         | 37 (21)  | 8 (20)            | 21 (24)  | 16 (18) | 3 (25)  | 9 (23)  | 25 (22) |
| Postmenopausal women (n=878)          |          |             |                |          |                   |          |         |         |         |         |
| Total lignans                         |          |             |                |          |                   |          |         |         |         |         |
| <119                                  | 129 (32) | 190 (41)    | 30 (39)        | 160 (41) | 30 (39)           | 100 (38) | 60 (46) | 19 (42) | 42 (38) | 91 (41) |
| 119-187                               | 139 (34) | 142 (30)    | 26 (34)        | 116 (30) | 26 (34)           | 80 (31)  | 36 (27) | 16 (36) | 39 (35) | 59 (26) |
| >187                                  | 141 (34) | 137 (29)    | 21 (27)        | 116 (30) | 21 (27)           | 81 (31)  | 35 (27) | 10 (22) | 29 (26) | 73 (33) |
| Lariciresinol                         |          |             |                |          |                   |          |         |         |         |         |
| <38.6                                 | 135 (33) | 198 (42)    | 33 (10)        | 165 (50) | 33 (43)           | 110 (42) | 55 (42) | 23 (51) | 45 (41) | 90 (40) |
| 38.6-61.5                             | 134 (33) | 134 (29)    | 22 (29)        | 112 (29) | 22 (29)           | 69 (26)  | 43 (33) | 13 (29) | 33 (30) | 64 (29) |
| >61.5                                 | 140 (34) | 137 (29)    | 22 (29)        | 115 (29) | 22 (29)           | 82 (31)  | 33 (25) | 9 (20)  | 32 (29) | 69 (31) |
| Secoisolariciresinol                  |          |             |                |          |                   |          |         |         |         |         |

|                                     |          |                          |          |          |                              |          |         |                        |          |         |
|-------------------------------------|----------|--------------------------|----------|----------|------------------------------|----------|---------|------------------------|----------|---------|
| <47.5                               | 126 (31) | 171 (37)                 | 24 (31)  | 147 (38) | 24 (8)                       | 96 (32)  | 51 (17) | 17 (38)                | 44 (40)  | 81 (36) |
| 47.5-74.8                           | 139 (34) | 141 (30)                 | 25 (32)  | 116 (30) | 25 (32)                      | 77 (29)  | 39 (30) | 15 (33)                | 32 (29)  | 66 (30) |
| >74.8                               | 144 (35) | 157 (33)                 | 28 (36)  | 129 (33) | 28 (36)                      | 88 (34)  | 41 (31) | 13 (29)                | 34 (31)  | 76 (34) |
| <b>Matairesinol</b>                 |          |                          |          |          |                              |          |         |                        |          |         |
| <2.6                                | 133 (39) | 205 (61)                 | 31 (40)  | 174 (44) | 31 (40)                      | 123 (47) | 51 (39) | 21 (47)                | 49 (45)  | 97 (44) |
| 2.6-4.4                             | 142 (35) | 142 (30)                 | 29 (38)  | 113 (29) | 29 (38)                      | 68 (26)  | 45 (34) | 15 (33)                | 36 (33)  | 57 (26) |
| >4.4                                | 134 (33) | 122 (26)                 | 17 (22)  | 105 (27) | 17 (22)                      | 70 (27)  | 35 (27) | 9 (20)                 | 25 (23)  | 69 (31) |
| <b>Pinoresinol</b>                  |          |                          |          |          |                              |          |         |                        |          |         |
| <18.9                               | 128 (31) | 176 (38)                 | 29 (38)  | 147 (48) | 29 (38)                      | 96 (37)  | 51 (39) | 19 (42)                | 41 (37)  | 80 (36) |
| 18.9-37.4                           | 143 (35) | 157 (33)                 | 31 (40)  | 126 (32) | 31 (40)                      | 86 (33)  | 40 (30) | 16 (36)                | 40 (36)  | 64 (29) |
| >37.4                               | 138 (34) | 136 (29)                 | 17 (22)  | 119 (30) | 17 (22)                      | 79 (30)  | 40 (31) | 10 (22)                | 29 (26)  | 79 (35) |
|                                     |          | Estrogen receptor status |          |          | Progesterone receptor status |          |         | HER2 <i>neu</i> status |          |         |
|                                     |          | Negative                 | Positive |          | Negative                     | Positive |         | Negative               | Positive |         |
| <b>Premenopausal women (n=416)</b>  |          |                          |          |          |                              |          |         |                        |          |         |
| <b>Total lignans</b>                |          |                          |          |          |                              |          |         |                        |          |         |
| <119                                | 74 (37)  | 27 (69)                  | 60 (41)  |          | 31 (63)                      | 56 (41)  |         | 67 (48)                | 17 (57)  |         |
| 119-187                             | 64 (32)  | 8 (21)                   | 51 (35)  |          | 11 (23)                      | 48 (35)  |         | 42 (30)                | 10 (33)  |         |
| >187                                | 64 (32)  | 4 (10)                   | 36 (25)  |          | 7 (14)                       | 33 (24)  |         | 32 (23)                | 3 (10)   |         |
| <b>Lariciresinol</b>                |          |                          |          |          |                              |          |         |                        |          |         |
| <38.6                               | 68 (34)  | 27 (69)                  | 62 (42)  |          | 33 (67)                      | 56 (41)  |         | 70 (50)                | 16 (53)  |         |
| 38.6-61.5                           | 69 (34)  | 6 (15)                   | 48 (33)  |          | 8 (16)                       | 46 (34)  |         | 41 (29)                | 8 (27)   |         |
| >61.5                               | 65 (32)  | 6 (15)                   | 37 (25)  |          | 8 (16)                       | 35 (26)  |         | 30 (21)                | 6 (20)   |         |
| <b>Seco-isolariciresinol</b>        |          |                          |          |          |                              |          |         |                        |          |         |
| <47.5                               | 77 (38)  | 23 (59)                  | 63 (43)  |          | 27 (55)                      | 59 (43)  |         | 64 (45)                | 16 (53)  |         |
| 47.5-74.8                           | 64 (32)  | 11 (28)                  | 44 (30)  |          | 14 (29)                      | 41 (30)  |         | 41 (29)                | 11 (37)  |         |
| >74.8                               | 61 (30)  | 5 (13)                   | 40 (27)  |          | 8 (16)                       | 37 (27)  |         | 36 (26)                | 3 (10)   |         |
| <b>Matairesinol</b>                 |          |                          |          |          |                              |          |         |                        |          |         |
| <2.6                                | 70 (35)  | 16 (41)                  | 63 (43)  |          | 19 (39)                      | 60 (44)  |         | 61 (43)                | 15 (50)  |         |
| 2.6-4.48                            | 61 (30)  | 12 (31)                  | 46 (31)  |          | 15 (31)                      | 43 (31)  |         | 46 (33)                | 7 (23)   |         |
| >4.4                                | 71 (35)  | 11 (28)                  | 38 (26)  |          | 15 (31)                      | 34 (25)  |         | 34 (24)                | 8 (27)   |         |
| <b>Pinoresinol</b>                  |          |                          |          |          |                              |          |         |                        |          |         |
| <18.9                               | 75 (37)  | 28 (72)                  | 63 (43)  |          | 32 (65)                      | 59 (43)  |         | 71 (50)                | 15 (50)  |         |
| 18.9-37.4                           | 60 (30)  | 4 (10)                   | 50 (34)  |          | 6 (12)                       | 48 (35)  |         | 41 (29)                | 7 (23)   |         |
| >37.4                               | 67 (33)  | 7 (18)                   | 34 (23)  |          | 11 (23)                      | 30 (22)  |         | 29 (21)                | 8 (27)   |         |
| <b>Postmenopausal women (n=878)</b> |          |                          |          |          |                              |          |         |                        |          |         |
| <b>Total lignans</b>                |          |                          |          |          |                              |          |         |                        |          |         |
| <119                                | 129 (31) | 29 (33)                  | 147 (43) |          | 53 (36)                      | 123 (44) |         | 136 (41)               | 22 (42)  |         |
| 119-187                             | 139 (34) | 20 (23)                  | 109 (32) |          | 41 (27)                      | 87 (31)  |         | 99 (30)                | 15 (28)  |         |
| >187                                | 141 (35) | 38 (44)                  | 87 (25)  |          | 55 (37)                      | 70 (25)  |         | 99 (30)                | 16 (30)  |         |

|                              |          |           |          |           |          |            |                 |
|------------------------------|----------|-----------|----------|-----------|----------|------------|-----------------|
| Lariciresinol                |          |           |          |           |          |            |                 |
| <38.6                        | 135 (33) | 30 (34)   | 153 (45) | 52 (35)   | 131 (47) | 141 (42)   | 21 (40)         |
| 38.6-61.5                    | 134 (33) | 22 (25)   | 102 (30) | 46 (31)   | 77 (27)  | 94 (28)    | 18 (34)         |
| >61.5                        | 140 (34) | 35 (40)   | 88 (26)  | 51 (34)   | 72 (26)  | 99 (30)    | 14 (26)         |
| Secoisolariciresinol         |          |           |          |           |          |            |                 |
| <47.5                        | 126 (31) | 22 (25)   | 136 (40) | 47 (31)   | 111 (40) | 126 (38)   | 19 (36)         |
| 47.5-74.8                    | 139 (34) | 27 (31)   | 103 (30) | 46 (31)   | 83 (30)  | 98 (29)    | 17 (32)         |
| >74.8                        | 144 (35) | 38 (44)   | 104 (30) | 56 (38)   | 86 (30)  | 110 (33)   | 17 (32)         |
| Matairesinol                 |          |           |          |           |          |            |                 |
| <2.6                         | 133 (32) | 31 (36)   | 154 (45) | 57 (38)   | 128 (46) | 145 (43)   | 23 (43)         |
| 2.6-4.4                      | 142 (35) | 22 (25)   | 109 (32) | 37 (25)   | 94 (34)  | 96 (29)    | 17 (32)         |
| >4.4                         | 134 (33) | 34 (39)   | 80 (23)  | 55 (37)   | 58 (21)  | 93 (28)    | 13 (25)         |
| Pinoresinol                  |          |           |          |           |          |            |                 |
| <18.9                        | 128 (31) | 29 (33)   | 134 (39) | 48 (32)   | 115 (41) | 124 (37)   | 19 (36)         |
| 18.9-37.4                    | 143 (35) | 25 (29)   | 118 (34) | 48 (32)   | 94 (34)  | 105 (31)   | 20 (38)         |
| >37.4                        | 138 (34) | 33 (38)   | 91 (27)  | 53 (36)   | 71 (25)  | 105 (31)   | 14 (26)         |
|                              |          | Luminal A |          | Luminal B |          | HER2 array | Triple negative |
| Premenopausal women (n=416)  |          |           |          |           |          |            |                 |
| Total lignans                |          |           |          |           |          |            |                 |
| <119                         | 74 (37)  | 46 (41)   |          | 13 (57)   |          | 4 (57)     | 20 (74)         |
| 119-187                      | 64 (32)  | 38 (34)   |          | 7 (30)    |          | 3 (43)     | 4(15)           |
| >187                         | 29 (26)  | 3 (13)    |          | 0 (0)     |          | 3 (11)     | 9 (20)          |
| Lariciresinol                |          |           |          |           |          |            |                 |
| <38.6                        | 68 (34)  | 48 (42)   |          | 12 (52)   |          | 4 (57)     | 21 (78)         |
| 38.6-61.5                    | 69 (34)  | 39 (35)   |          | 5 (22)    |          | 3 (43)     | 2 (7)           |
| >61.5                        | 65 (32)  | 26 (23)   |          | 6 (26)    |          | 0 (0)      | 4 (15)          |
| Secoisolariciresinol         |          |           |          |           |          |            |                 |
| <47.5                        | 77 (38)  | 47 (42)   |          | 13 (57)   |          | 3 (43)     | 17 (63)         |
| 47.5-74.8                    | 64 (32)  | 34 (30)   |          | 7 (30)    |          | 4 (57)     | 6 (22)          |
| >74.8                        | 61 (30)  | 32 (28)   |          | 3 (13)    |          | 0 (0)      | 4 (15)          |
| Matairesinol                 |          |           |          |           |          |            |                 |
| <2.6                         | 70 (35)  | 47 (42)   |          | 12 (52)   |          | 3 (43)     | 13 (48)         |
| 2.6-4.4                      | 61 (30)  | 39 (35)   |          | 4 (17)    |          | 3 (43)     | 7 (26)          |
| >4.4                         | 71 (35)  | 27 (24)   |          | 7 (30)    |          | 1 (14)     | 7 (26)          |
| Pinoresinol                  |          |           |          |           |          |            |                 |
| <18.9                        | 75 (37)  | 48 (42)   |          | 11 (48)   |          | 4 (57)     | 22 (81)         |
| 18.9-37.4                    | 60 (30)  | 41 (36)   |          | 6 (26)    |          | 1 (14)     | 0 (0)           |
| >37.4                        | 67 (33)  | 24 (21)   |          | 6 (26)    |          | 2 (29)     | 5 (18)          |
| Postmenopausal women (n=878) |          |           |          |           |          |            |                 |

|                      |          |          |         |        |         |
|----------------------|----------|----------|---------|--------|---------|
| Total lignans        |          |          |         |        |         |
| <119                 | 129 (32) | 121 (43) | 13 (39) | 9 (45) | 15 (28) |
| 119-187              | 139 (34) | 87 (31)  | 9 (27)  | 6 (30) | 12 (23) |
| >187                 | 141 (35) | 73 (26)  | 11 (33) | 5 (25) | 26 (49) |
| Lariciresinol        |          |          |         |        |         |
| <38.6                | 135 (33) | 124 (44) | 13 (39) | 8 (40) | 17 (32) |
| 38.6-61.5            | 134 (33) | 83 (30)  | 11 (33) | 7 (35) | 11 (21) |
| >61.5                | 140 (34) | 74 (26)  | 9 (27)  | 5 (25) | 25 (47) |
| Secoisolariciresinol |          |          |         |        |         |
| <47.5                | 126 (31) | 115 (41) | 10 (30) | 9 (45) | 11 (21) |
| 47.5-74.8            | 139 (34) | 82 (29)  | 12 (36) | 5 (25) | 16 (30) |
| >74.8                | 144 (35) | 84 (30)  | 11 (33) | 6 (30) | 26 (49) |
| Matairesinol         |          |          |         |        |         |
| <2.6                 | 133 (33) | 129 (46) | 14 (42) | 9 (45) | 16 (30) |
| 2.6-4.4              | 142 (35) | 84 (30)  | 11 (33) | 6 (30) | 12 (23) |
| >4.4                 | 134 (33) | 68 (24)  | 8 (24)  | 5 (25) | 25 (47) |
| Pinoresinol          |          |          |         |        |         |
| <18.9                | 128 (31) | 111 (40) | 11 (33) | 8 (40) | 13 (25) |
| 18.9-37.4            | 143 (35) | 90 (32)  | 14 (42) | 6 (30) | 15 (28) |
| >37.4                | 138 (34) | 80 (28)  | 8 (24)  | 6 (30) | 25 (47) |

<sup>1</sup>Values are n (%); percentages may not sum to 100 because of rounding
